# Supplementary material for: Evaluation of Native Entomopathogenic Fungi for the Control of Fall Armyworm (Spodoptera frugiperda) in Thailand: A Sustainable Way for Eco-Friendly Agriculture
Source: MDPI journal article supplement (doi:10.3390/jof7121073), 2021-12-13
Supplement: s1 [file s1]

**Supplementary Table S1.** The macroscopic and microscopic colony characteristics of the six isolates of *Beauveria bassiana*.

| Isolate | Colony Characteristics |       |                    |           |         | Conidial        |                |
|---------|------------------------|-------|--------------------|-----------|---------|-----------------|----------------|
|         | *Colour                | Shape | Growth Pattern     | Elevation | Texture | Length (µm)     | Width (µm)     |
| BCMU1   | White/Brown            | Round | Disperse           | Raised    | Smooth  | 2.523±0.147 abc | 1.685±0.097 a  |
| BCMU2   | White/Yellowish brown  | Round | Dense and disperse | Raised    | Smooth  | 2.286±0.077 a   | 1.689±0.071 a  |
| BCMU3   | White/Brown            | Oval  | Dense Disperse     | Raised    | Smooth  | 2.749±0.126 bc  | 2.165±0.079 c  |
| BCMU4   | Off-white/Yellowish    | Round | Disperse           | Raised    | Smooth  | 2.412±0.092 ab  | 1.880±0.048 ab |
| BCMU5   | White/Brown            | Oval  | Disperse           | Raised    | Smooth  | 2.872±0.103 c   | 2.059±0.064 bc |
| BCMU6   | White/Yellowish-brown  | Round | Dense and disperse | Raised    | Smooth  | 2.885±0.076 c   | 2.032±0.069 bc |

\*Colony color on the top and reverse side.
